# Supplementary material for: Experimental Evolution of Multidrug Resistance in Neurospora crassa under Antifungal Azole Stress
Source: MDPI journal article supplement (doi:10.3390/jof8020198), 2022-02-18
Supplement: s1 [file s1]

## Supplementary materials

### Contents:

**Table S1:** Primers used for construction and verification of *cdr4* deletion strain.

**Table S2:** Gene specific primers used for qRT-PCR.

**Table S3:** Transcript levels of genes encoding oligopeptide (OPT) transporters and peptide transporters (PTR/POT).

**Table S4:** Summary of SNPs and Indel mutations in the tested strains.

**Table S5:** The information of SNPs.

**Table S6:** The information of the Indels.

**Figure S1:** *N. crassa* acquired multidrug resistance under azole stress.

**Figure S2:** Drug susceptibility test of gene knockout mutants for transmembrane transporters.

**Figure S3:** Effects of *cdr4* deletion or overexpression on drug susceptibility.

**Figure S4:** Drug susceptibility test of knockout mutants of genes with SNPs or Indels in the evolved resistant strains.

**Figure S5:** Transcript levels of catalase encoding genes in the evolved resistant strains and WT.

**Table S1.** Primers used for construction and verification of *cdr4* deletion strains.

| Primer name                       | Sequence(5'→3')                                        | Note                                               |
|-----------------------------------|--------------------------------------------------------|----------------------------------------------------|
| <i>cdr4</i> <sup>KO</sup> -5F     | GTAACGCCAGGGTTTTCCAGTCACGACGGGTAACGAG-<br>TATATCCGTGG  |                                                    |
| <i>cdr4</i> <sup>KO</sup> -5R     | ATCCACTTAACGTTACTGAAATCTCCAACGACGAGTACAG-<br>TGACGAAGG |                                                    |
| <i>cdr4</i> <sup>KO</sup> -3F     | CTCCTTCAATATCATCTTCTGTCTCCGACGAAGAGAGAGAA-<br>TAGCGAGG | For construction of<br><i>cdr4</i> deletion strain |
| <i>cdr4</i> <sup>KO</sup> -3R     | GCGGATAACAATTTACACAGGAAACAGCAGAGACCACAAC-<br>GTAAGTGC  |                                                    |
| <i>cdr4</i> <sup>KO</sup> -HphF   | GTCGGAGACAGAAGATGATATTGAAGGAGC                         |                                                    |
| <i>cdr4</i> <sup>KO</sup> -HphR   | GTTGGAGATTTACAGTAACGTTAAGTGGAT                         |                                                    |
| <i>cdr4</i> <sup>KO</sup> -Vef F1 | CGAAGTCGATACCCATTTC                                    |                                                    |
| <i>cdr4</i> <sup>KO</sup> -Vef R1 | CTTGTATGGAGCAGCAGACGC                                  | For transformant<br>verification by PCR            |
| <i>cdr4</i> <sup>KO</sup> -Vef F2 | TTGTGATCCGCTGGACGACT                                   |                                                    |
| <i>cdr4</i> <sup>KO</sup> -Vef R2 | ACCACCGAACATCCGAAACGA                                  |                                                    |

**Table S2.** Gene specific primers used for qRT-PCR.

| Gene             | Locus No. | Forward primer(5'→3')         | Reverse primer(5'→3')         | Source     |
|------------------|-----------|-------------------------------|-------------------------------|------------|
| <i>β-tubulin</i> | NCU04540  | CCCAA-<br>GAACATGATGGCTGCTTCT | TTGTTCTGAACGTTGCG-<br>CATCTGG | (1)        |
| <i>erg11</i>     | NCU02624  | AAATCGATTACGGCTAC-<br>GGTCTCG | TATCGCTACCATCCAC-<br>GTTCTGA  |            |
| <i>cdr4</i>      | NCU05591  | GCTTTGGAAATGGATGGTGAC-<br>GCT | AAATGCAGAGGGCGGTCTTA-<br>GAGT |            |
| <i>erg1</i>      | NCU08280  | CGTGGTGCTGGCGAGACATTA         | CCTCCTTCCAAATCGTCGGCA         |            |
| <i>chs-1</i>     | NCU03611  | GTCGACCTACATCAACATCC          | GTGGCTTCTCAATCTCTTCC          |            |
| <i>chs-3</i>     | NCU04251  | CACGGTTGTACATGGGTATG          | GAGACGATGAGGGTGTAGAA          |            |
| <i>chs-4</i>     | NCU09324  | CCACACACTCTCGTTTCTC           | GCTTGACCGACTCTCATTT           |            |
| <i>abc-8</i>     | NCU07546  | TTCTATCGCTTCTGGATGATTG        | GCCAGTGAGTCCTTGTAATG          |            |
| <i>abc-3</i>     | NCU09975  | TCGTCTTTGGCGCTTAC             | TAGCCAGTGACGAGATAGTT          |            |
| <i>atr1-2</i>    | NCU10009  | GGAGTACATGGAAC-<br>CTTTCTTC   | CAAATCCCTCCACCTGTTATC         |            |
| <i>msf-9</i>     | NCU05079  | TCCTCTTCCTTCCCATCTAC          | GTAGGAACAAGAAGGACGATAG        | This study |
| NCU03171         | NCU03171  | GCTGTGCACTCTCGTTATATTC        | GAGGTCCAAAGATCTCTCCT          |            |
| <i>msf-8</i>     | NCU08738  | TTCGCCATTGGTGGTATTT           | GATCGGTAACAACCGAAGAG          |            |
| NCU10763         | NCU10763  | ACAGTTCCTCAGCTCCTT            | CATAGGCGAGCCAACATATC          |            |
| <i>opt-4</i>     | NCU06352  | CCAGCACAGCAGCATTTA            | CATGTAGTGGCCTAGTTTGAG         |            |
| NCU08397         | NCU08397  | GAGGTTACTCTGAACGTCTTG         | CGGGATCTTGACATAATGGG          |            |
| <i>opt-3</i>     | NCU07894  | GTGGTTGAGCTGGATCTATG          | CCACTCCACACTCACTCTA           |            |
| NCU17261         | NCU17261  | TTCAACTGGATGACATGGA-<br>TAG   | GAAGAAAGGCTGGGATAGTG          |            |
| <i>opt-5</i>     | NCU17269  | CGGTGGTGTTTATGGGATAC          | ATGGTCACATTAGGCAAGTC          |            |
| <i>opt-1</i>     | NCU09773  | GCATCTGGTCGTATCTCAAC          | GCAGCCGAAACCAAGTAA            |            |
| <i>opt-2</i>     | NCU04991  | GCAAGCCATCCAGATGTT            | GAATGTCGCGCCGATTAT            |            |
| NCU10381         | NCU10381  | GGCGGTGGGTATGTATAATG          | CGATACTCAGGAAACCTTCAC         |            |
| NCU09874         | NCU09874  | CTAATTGCGCGTTCCAAATC          | CTCACCAGACAAGGTAGTAGT         |            |
| <i>cat-1</i>     | NCU08791  | TACCACCAACCACCCTAA            | GCCTGGTTGGCAGAAATA            |            |
| <i>cat-3</i>     | NCU00355  | CCGTCCTAGCCAGATTCTTA          | CCCTTGATAACCTCGTCCT           |            |
| <i>cat-4</i>     | NCU05169  | TTAAGGAGACCGGAGAAGAC          | CTTCTCAAGCTCATCCAATC          |            |
| <i>vma-1</i>     | NCU01207  | CCAACAAAATGGCGCCGAG           | CCAATCATAATAGCAACACC          | (2)        |

1. Chen, X.; Xue, W.; Zhou, J.; Zhang, Z.; Wei, S.; Liu, X.; Sun, X.; Wang, W.; Li, S. De-repression of CSP-1 activates adaptive responses to antifungal azoles. *Scientific Reports* **2016**, *6*, doi:10.1038/srep19447.2. Cusick, K.D.; Fitzgerald, L.A.; Pirlo, R.K.; Cockrell, A.L.; Petersen, E.R.; Biffinger, J.C. Selection and Evaluation of Reference Genes for Expression Studies with Quantitative PCR in the Model Fungus *Neurospora crassa* under Different Environmental Conditions in Continuous Culture. *Plos One* **2014**, *9*, doi:10.1371/journal.pone.0112706.

**Table S3.** Transcript levels of genes encoding oligopeptide (OPT) transporters and peptide transporters (PTR/POT).

| Locus No.    | Gene         | Function                                    | Homologue encoding gene in <i>C. albicans</i> | FPK<br>M_W<br>T | FPKM_<br>WT_Po<br>xB | WT         | 30thK<br>1 | 30thK<br>2 | 26thV<br>1 | 24thV<br>2 |
|--------------|--------------|---------------------------------------------|-----------------------------------------------|-----------------|----------------------|------------|------------|------------|------------|------------|
| NCU0873<br>8 | <i>mfs-8</i> | MFS peptide transporter                     | PTR2, PTR22                                   | 1.000<br>0      | 0.41488<br>9         | 1.000<br>0 | 0.6528     | 0.5043     | 0.4861     | 0.2293     |
| NCU0507<br>9 | <i>mfs-9</i> | MFS peptide transporter                     | PTR2, PTR22                                   | 1.000<br>0      | 9.34739<br>4         | 1.000<br>0 | 0.2954     | 1.3339     | 1.7093     | 0.1345     |
| NCU0317<br>1 |              | Sexual differentiation process protein isp4 | OPT1, OPT4, OPT5, OPT6                        | 1.000<br>0      | 0.58546<br>4         | 0.995<br>7 | 0.6238     | 0.8258     | 0.8381     | 0.3725     |
| NCU1076<br>3 |              | small oligopeptide transporter              | OPT1, OPT4, OPT5, OPT6                        | 1.000<br>0      | 0.77155<br>7         | 1.000<br>0 | 0.6651     | 0.9748     | 1.0412     | 1.3482     |
| NCU0635<br>2 | <i>opt-4</i> | OPT-domain-containing protein               | OPT1, OPT5                                    | 1.000<br>0      | 0.82513<br>5         | 1.097<br>6 | 1.0072     | 1.2861     | 1.3067     | 2.3329     |
| NCU0839<br>7 |              | unnamed protein product                     | OPT1, OPT4, OPT5, OPT6                        | 1.000<br>0      | 0.26037<br>5         | 1.000<br>0 | 0.0822     | 0.2007     | 0.4778     | 0.0112     |
| NCU0789<br>4 | <i>opt-3</i> | oligopeptide transporter 2                  | OPT1, OPT4, OPT5, OPT6                        | 1.000<br>0      | 64.1176<br>5         | 1.000<br>0 | 0.9208     | 0.6652     | 0.6222     | 1.9504     |
| NCU1726<br>1 |              | hypothetical protein                        | OPT2, OPT3, OPT4, OPT5, OPT6                  | 1.000<br>0      | 1.45050<br>5         | 1.000<br>0 | 2.0439     | 1.4442     | 2.0969     | 1.4521     |
| NCU1726<br>9 | <i>opt-5</i> | oligopeptide transporter OPT                | OPT5, OPT7                                    | 1.000<br>0      | 0.5<br>0             | 1.000<br>0 | 0.2397     | 1.4182     | 2.5003     | 1.2930     |
| NCU0977<br>3 | <i>opt-1</i> | oligopeptide transporter-1                  | OPT5                                          | 1.000<br>0      | 0.05332<br>8         | 1.000<br>0 | 0.0359     | 0.0847     | 0.2659     | 0.0023     |
| NCU0499<br>1 | <i>opt-2</i> | oligopeptide transporter-2                  | OPT5                                          | 1.000<br>0      | 0.28122<br>2         | 1.000<br>0 | 0.9219     | 0.5394     | 0.9100     | 1.4717     |
| NCU1038<br>1 |              | oligonucleotide transporter                 | OPT8                                          | 1.000<br>0      | 0.66411<br>9         | 1.000<br>0 | 1.1865     | 1.8073     | 1.5962     | 2.2886     |
| NCU0987<br>4 |              | hypothetical protein                        | OPT8                                          | 1.000<br>0      | 1.25637<br>5         | 1.000<br>0 | 0.9444     | 1.2600     | 0.8231     | 0.1457     |

**Table S4.** Summary of SNPs and Indel mutations in the tested strains.

| Strain | Synonymous | Nonsynonymous | Insertion | Deletion |
|--------|------------|---------------|-----------|----------|
| WT     | 256        | 135           | 24        | 40       |
| 30thC1 | 669        | 318           | 25        | 41       |
| 26thV1 | 675        | 318           | 25        | 41       |
| 30thK1 | 673        | 328           | 27        | 42       |
| 30thK2 | 659        | 318           | 20        | 36       |

Table S5. The information of SNPs.

| Position    | Ref | W | 30th | 26th | 30th | 30th | Ref_Base<br><->Sam-<br>ple_Base | Co-<br>don_Mu-<br>tate | Aa_M<br>utate | Gene_Id      | Function                                   | Mu-<br>tated<br>Strain | Kt<br>c        | Ter<br>b | Am<br>b        | M<br>bc | Pox<br>b |
|-------------|-----|---|------|------|------|------|---------------------------------|------------------------|---------------|--------------|--------------------------------------------|------------------------|----------------|----------|----------------|---------|----------|
| 15107<br>41 | G   | G | G    | G    | A    | G    | G<->A                           | GGC<->G<br>AC          | G<->D         | NCU020<br>58 | hp                                         | 30thK1                 | R <sup>a</sup> | R        | N <sup>c</sup> | N       | N        |
| 15107<br>76 | A   | A | A    | A    | G    | A    | A<->G                           | ACG<->G<br>CG          | T<->A         | NCU020<br>58 | hp                                         | 30thK1                 | R              | R        | N              | N       | N        |
| 34606<br>98 | A   | A | A    | A    | G    | A    | T<->C                           | CTA<->C<br>CA          | L<->P         | NCU044<br>10 | tRNA-pro-<br>cessing-10                    | 30thK1                 |                |          |                |         |          |
| 14888<br>46 | T   | T | T    | T    | G    | G    | T<->G                           | AAT<->C<br>AT          | N<->H         | NCU020<br>65 | DUF726 do-<br>main-contain-<br>ing protein | 30thK1<br>,<br>30thK2  | N              | N        | N              | N       | N        |
| 16139<br>65 | A   | A | A    | G    | G    | A    | A<->G                           | ATC<->G<br>TC          | I<->V         | NCU020<br>34 | RIP defective                              | 26thV1<br>,<br>30thK1  | N              | N        | N              | N       | N        |
| 16049<br>43 | A   | A | A    | G    | A    | G    | T<->C                           | CTC<->C<br>CC          | L<->P         | NCU020<br>36 | tRNA-splic-<br>ing endonu-<br>clease       | 26thV1<br>,<br>30thK2  | N              | N        | S <sup>b</sup> | S       | N        |
| 26930<br>80 | A   | A | A    | G    | A    | G    | T<->C                           | TCG<->C<br>CG          | S<->P         | NCU025<br>48 | hp                                         | 26thV1<br>,<br>30thK2  | R              | N        | S              | N       | N        |
| 49928<br>9  | G   | G | G    | T    | G    | T    | G<->T                           | GTA<->T<br>TA          | V<->L         | NCU034<br>91 | RNA splicing<br>factor Pad-1               | 26thV1<br>,<br>30thK2  | R              | N        | N              | N       | N        |
| 30375<br>66 | G   | G | G    | A    | G    | A    | C<->T                           | ACG<->A<br>TG          | T<->M         | NCU166<br>67 | hp                                         | 26thV1<br>,<br>30thK2  |                |          |                |         |          |
| 19214<br>95 | T   | T | T    | A    | T    | A    | T<->A                           | AGT<->A<br>GA          | S<->R         | NCU036<br>41 | Beta-gluco-<br>sidase 2                    | 26thV1<br>,<br>30thK2  | N              | N        | N              | N       | N        |
| 13991<br>97 | G   | G | G    | C    | G    | G    | C<->G                           | CTT<->GT<br>T          | L<->V         | NCU055<br>91 | ABC trans-<br>porter CDR4                  | 26thV1                 | S              | S        | N              | N       | R        |

<sup>a</sup> R: The gene knockout mutant showed resistant phenotype (R) to the indicated antifungal drug compared to the WT strain. <sup>b</sup> S: The gene knockout mutant showed hypersensitive phenotype (S) to the indicated antifungal drug compared to the WT strain. <sup>c</sup> N: The gene knockout mutant showed no difference (N) to the indicated antifungal drug relative to the WT strain.

Table S6. The information of the Indels.

| Ref_ID    | Position | Type | Base       | Strand | Gene_Id   | Function                                                      | Mutated Strains        | KT C           | Ter b | Am b           | MB C | Pox b          |
|-----------|----------|------|------------|--------|-----------|---------------------------------------------------------------|------------------------|----------------|-------|----------------|------|----------------|
| CM0022 36 | 1467874  | D4   | TACC       | +      | NCU163 36 | 3-hydroxyacyl-CoA dehydrogenase                               | 30thK1                 |                |       |                |      |                |
| CM0022 36 | 1489033  | I3   | GAT        | -      | NCU020 65 | DUF726 domain-containing protein                              | 30thK1, 26thV1         | N              | N     | N              | N    | N              |
| CM0022 36 | 1494042  | I2   | AC         | +      | NCU020 63 | mitochondrial intermediate peptidase                          | 30thK1, 30thK2         |                |       |                |      |                |
| CM0022 36 | 1504458  | D1   | G          | -      | NCU020 60 | zinc metalloproteinase                                        | 30thK1                 | R <sup>a</sup> | R     | N <sup>c</sup> | N    | N              |
| CM0022 36 | 1504461  | D4   | GCAC       | -      | NCU020 60 | zinc metalloproteinase                                        | 30thK1                 | R              | R     | N              | N    | N              |
| CM0022 36 | 1523039  | D5   | GATGA      | +      | NCU020 55 | uridine nucleosidase Urh1                                     | 30thK1, 26thV1         | R              | N     | N              | N    | N              |
| CM0022 36 | 1538959  | D1   | T          | -      | NCU020 52 | transcription initiation factor TFIIId 127kD subunit, variant | 30thK1                 | N              | R     | N              | N    | N              |
| CM0022 36 | 1543660  | D1   | T          | +      | NCU020 51 | hp                                                            | 30thK1, 30thK2, 26thV1 | R              | R     | N              | N    | S <sup>b</sup> |
| CM0022 36 | 1574451  | D5   | TAGAA      | -      | NCU020 44 | GTP-binding protein                                           | 30thK1                 |                |       |                |      |                |
| CM0022 36 | 1580469  | D4   | GATT       | -      | NCU020 42 | sterol-4alpha-carboxylate 3-dehydrogenase (decarboxylating)   | 30thK1                 | N              | N     | N              | N    | N              |
| CM0022 36 | 1580475  | I4   | CAAC       | -      | NCU020 42 | sterol-4alpha-carboxylate 4-dehydrogenase (decarboxylating)   | 30thK1                 | N              | N     | N              | N    | N              |
| CM0022 36 | 1615222  | D2   | AA         | -      | NCU020 33 | hp                                                            | 30thK1, 26thV1         | S              | N     | S              | N    | N              |
| CM0022 36 | 1637568  | D4   | CAGG       | +      | NCU020 26 | hp                                                            | 30thK1                 | R              | R     | N              | N    | N              |
| CM0022 36 | 1637669  | D1   | A          | +      | NCU020 26 | hp                                                            | 30thK1, 30thK2         | R              | R     | N              | N    | N              |
| CM0022 36 | 1641288  | D9   | AACAAC AAA | +      | NCU020 24 | hp                                                            | 30thK1, 30thK2, 26thV1 | N              | N     | N              | N    | N              |
| CM0022 36 | 1641833  | I4   | AAAC       | +      | NCU020 24 | hp                                                            | 30thK1, 30thK2         | N              | N     | N              | N    | N              |
| CM0022 36 | 1641834  | I1   | A          | +      | NCU020 24 | hp                                                            | 30thK1                 | N              | N     | N              | N    | N              |
| CM0022 36 | 1673214  | D1   | C          | +      | NCU020 14 | hp                                                            | 30thK1, 26thV1         |                |       |                |      |                |
| CM0022 36 | 1673216  | D8   | TTAAGG AG  | +      | NCU020 14 | hp                                                            | 30thK1, 26thV1         |                |       |                |      |                |

| Ref_ID    | Position | Type | Base  | Strand | Gene_Id  | Function                                           | Mutated Strains | KT | Ter | Am | MB | Pox |
|-----------|----------|------|-------|--------|----------|----------------------------------------------------|-----------------|----|-----|----|----|-----|
|           |          |      |       |        |          |                                                    |                 | C  | b   | b  | C  | b   |
| CM0022 36 | 1675626  | I2   | TT    | -      | NCU02012 | hp                                                 | 30thK1, 30thK2  | R  | N   | S  | S  | S   |
| CM0022 36 | 1704179  | I4   | GATG  | -      | NCU02005 | phosphoadenosine phosphosulfate reductase          | 30thK1, 26thV1  |    |     |    |    |     |
| CM0022 36 | 1736108  | I5   | GGCCG | -      | NCU14007 | hp                                                 | 30thK1, 26thV1  |    |     |    |    |     |
| CM0022 36 | 1749270  | D1   | A     | -      | NCU01993 | ethanolaminephosphotransferase                     | 30thK1, 30thK2  | R  | N   | N  | N  | N   |
| CM0022 36 | 1818708  | I2   | TT    | +      | NCU01973 | SET-8                                              | 30thK1          | N  | N   | N  | N  | N   |
| CM0022 36 | 1904395  | I2   | GC    | +      | NCU01947 | hp                                                 | 30thK1          | N  | R   | N  | N  | N   |
| CM0022 37 | 2943417  | D1   | T     | +      | NCU01620 | hp                                                 | 30thK1          | N  | N   | N  | N  | N   |
| CM0022 36 | 5046154  | I1   | T     | +      | NCU03246 | tyrosine-protein phosphatase CDC14                 | 30thK1          | R  | N   | N  | N  | S   |
| CM0022 36 | 6108158  | I1   | T     | +      | NCU07390 | hp                                                 | 30thK1          |    |     |    |    |     |
| CM0022 36 | 117982   | D4   | CTTC  | +      | NCU08055 | glycoside hydrolase family 3 protein ZIP-1         | 30thK2          | N  | N   | N  | N  | N   |
| CM0022 36 | 1730716  | I2   | AA    | -      | NCU01997 | ABC transporter                                    | 30thK2          | N  | R   | N  | N  | N   |
| CM0022 36 | 1671820  | I3   | TCC   | +      | NCU02014 | hp                                                 | 30thK2, 26thV1  |    |     |    |    |     |
| CM0022 42 | 3212857  | I1   | T     | -      | NCU02243 | hp                                                 | 30thK2, 26thV1  | N  | N   | N  | N  | N   |
| CM0022 36 | 4307175  | I1   | G     | -      | NCU09308 | glycoprotease                                      | 30thK2          | N  | R   | N  | N  | N   |
| CM0022 40 | 5238569  | I1   | A     | -      | NCU04216 | hp                                                 | 30thK2, 26thV1  |    |     |    |    |     |
| CM0022 36 | 1835539  | D1   | T     | +      | NCU01967 | hp                                                 | 26thV1          | R  | N   | S  | N  | R   |
| CM0022 36 | 8866762  | I1   | G     | -      | NCU02867 | hp                                                 | 26thV1          | R  | R   | R  | N  | N   |
| KC6837 08 | 14197    | D1   | C     | +      | NCU16302 | mitochondrial ribosomal protein S5 (mitochondrion) | 26thV1          |    |     |    |    |     |

<sup>a</sup> R: The gene knockout mutant showed resistant phenotype (R) to the indicated antifungal drug compared to the WT strain. <sup>b</sup> S: The gene knockout mutant showed hypersensitive phenotype (S) to the indicated antifungal drug compared to the WT strain. <sup>c</sup> N: The gene knockout mutant showed no difference (N) to the indicated antifungal drug relative to the WT strain.

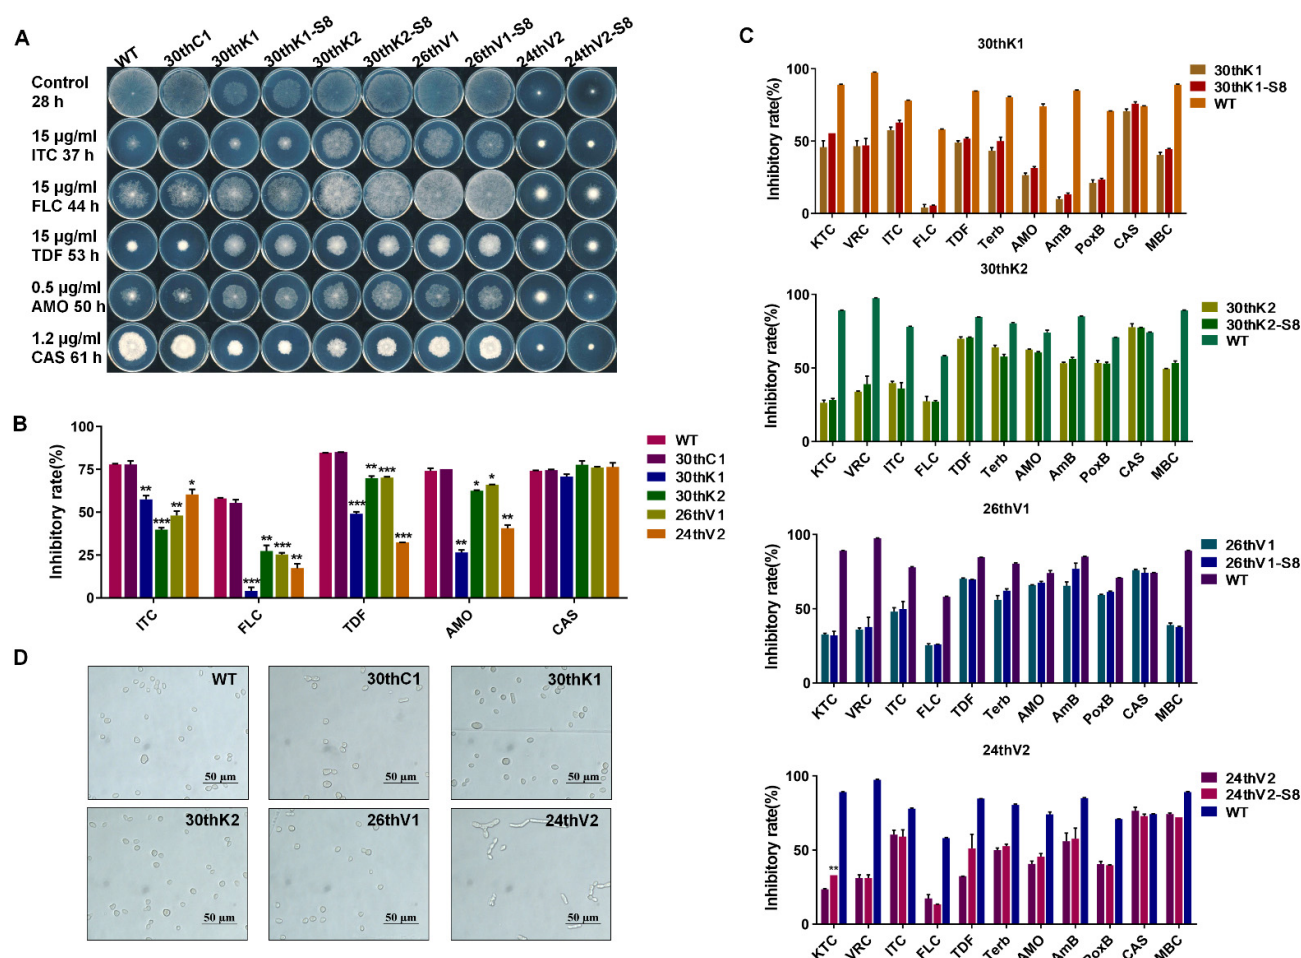

**Figure S1.** *N. crassa* acquired multidrug resistance under azole stress. (A) Drug susceptibility test of the indicated strains to different antifungals at designated concentrations. Two microliter aliquots of conidial suspension ( $2 \times 10^6$  conidia/mL) were inoculated in the center of plates ( $\phi 90$ -mm) with or without the antifungals. The plates were then incubated at 28°C for the indicated time. The experiment was independently repeated at least three times. (B) Relative growth inhibition rates were calculated based on colony diameters at indicated hours after drug treatment. Values from three replicates were used for statistical analysis. Means of the inhibition rates are shown, and standard deviations are marked with error bars. Difference significance between the evolved strains and the ancestral WT strain were estimated by the t-test and marked as \* ( $p < 0.05$ ), \*\* ( $p < 0.01$ ), and \*\*\* ( $p < 0.001$ ). (C) Relative growth inhibition rates were calculated based on colony diameters of colonies at indicated growth time. Values from three replicates were used for statistical analysis. Means of the inhibition rates are shown, and standard deviations are marked with error bars. Significance between the evolved strains and the ancestral WT strain was estimated by the t-test. Values with  $p < 0.001$ ,  $0.001 < p < 0.01$ , and  $0.01 < p < 0.05$  are marked with \*\*\*, \*\* and \*, respectively. (D) The spore morphology of the evolved populations and the ancestral WT strain. The abbreviation the antifungal drugs are explained: ITC (itraconazole), FLC (fluconazole), TDF (triadimefon), AMO (amorolfine), and CAS (caspofungin).

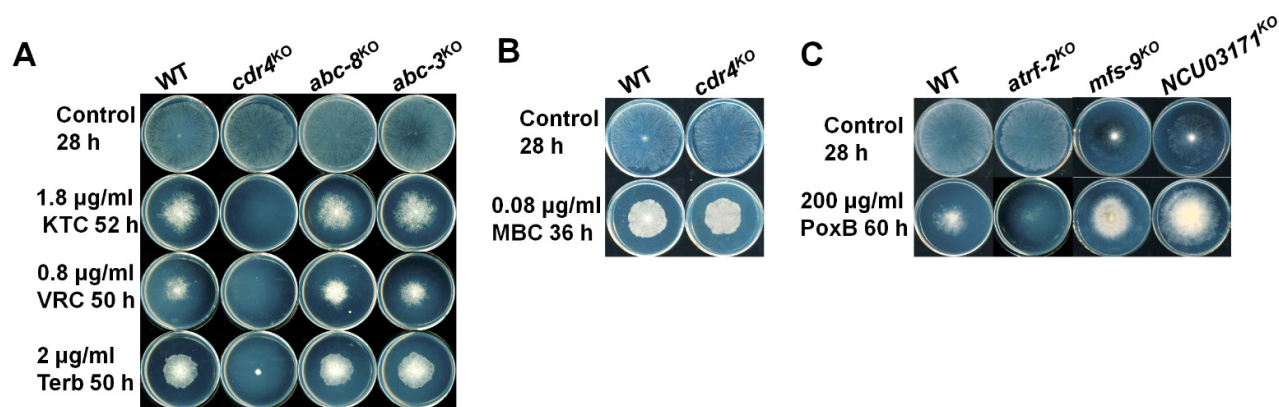

**Figure S2.** Drug susceptibility test of gene knockout mutants for transmembrane transporters, including (A) *cdr4*<sup>KO</sup>, *abc-8*<sup>KO</sup>, *abc-3*<sup>KO</sup> to KTC, VRC and Terb, (B) *cdr4*<sup>KO</sup> to MBC, and (C) *atrif-2*<sup>KO</sup>, *mfs-9*<sup>KO</sup>, and *NCU03171*<sup>KO</sup> to PoxB. Two microliter aliquots of conidial suspension ( $2 \times 10^6$  conidia/mL) were inoculated in the center of plates ( $\phi 90$ -mm) with or without the antifungals. The plates were then incubated at 28°C for the indicated time. The experiment was independently repeated at least three times.

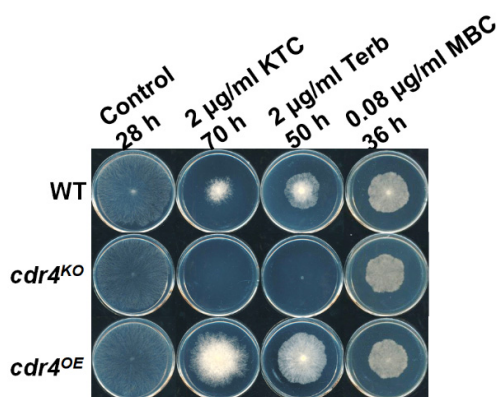

**Figure S3.** Effects of *cdr4* deletion or overexpression on drug susceptibility. Two microliter aliquots of conidial suspension ( $2 \times 10^6$  conidia/mL) were inoculated in the center of plates ( $\phi 90$ -mm) with or without the antifungals. The plates were then incubated at 28°C for the indicated time. The experiment was independently repeated at least three times.



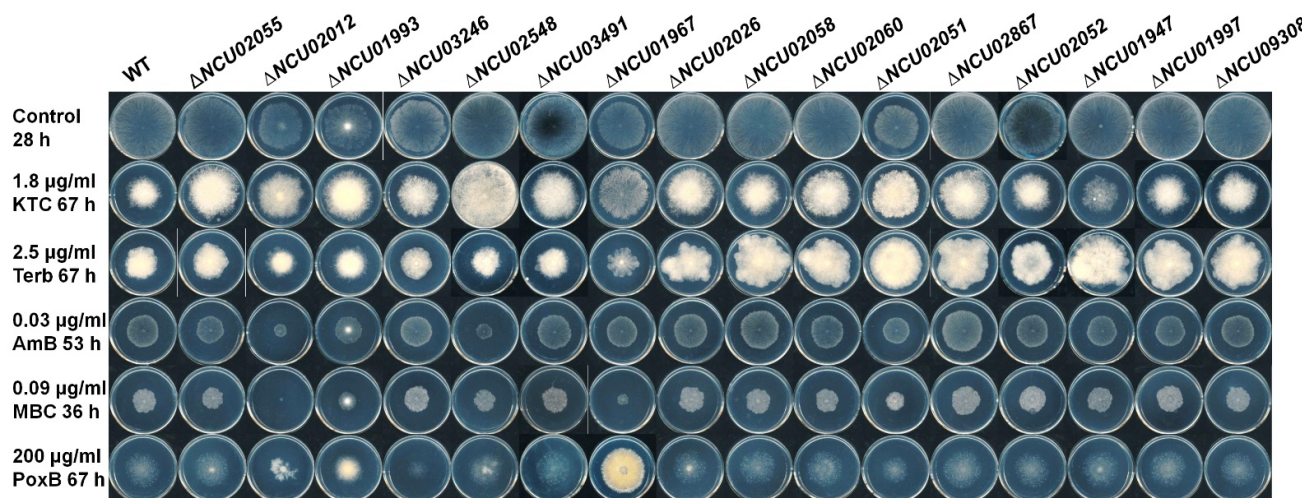

**Figure S4.** Drug susceptibility test of knockout mutants of genes with SNPs or Indels in the evolved resistant strains. Two microliter aliquots of conidial suspension ( $2 \times 10^6$  conidia/mL) were inoculated in the center of plates ( $\phi 90$ -mm) with or without the antifungals. The plates were then incubated at 28°C for the indicated time. The experiment was independently repeated at least twice.

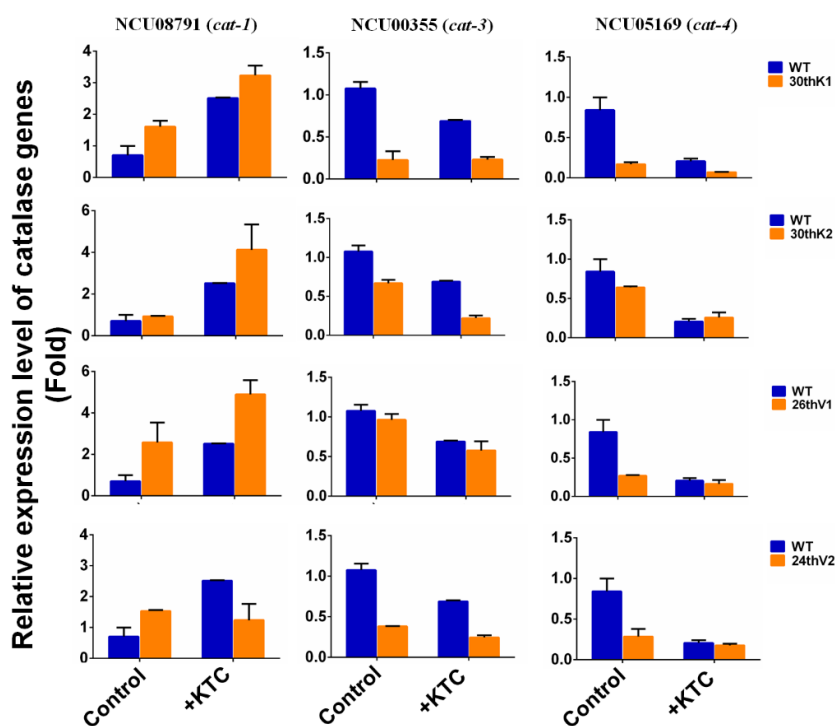

**Figure S5.** Transcript levels of catalase encoding genes (*cat-1*, *cat-3* and *cat-4*) in the evolved resistant strains and WT. Transcript levels were measured by qRT-PCR, calculated by  $2^{-\Delta\Delta C_t}$  method and normalized to  $\beta$ -tubulin. The results presented here are means of two biological replicates.
